# Supplementary material for: Maximum summer temperatures predict the temperature adaptation of Arctic soil bacterial communities
Source: Copernicus journal article supplement (doi:10.5194/bg-20-767-2023), 2023-02-17
Supplement: Supplementary file 1 [file bg-20-767-2023-supplement.zip]

Archive with 10 entries (10 files):
- Figure_S4_Pruned_Tree_results_ASV11.pdf
- Figure_S3_compare_RMSE_mods.pdf
- Figure_S2_comparison_regression_trees.pdf
- Table S2 and S3.docx
- Figure_S1_varImp_RandomForest.pdf
- bg-20-767-2023-supplement-title-page.pdf
- Table S1 Soil characteristics.docx
- File S1 - Methods.docx
- Table S4.docx
- Table S5 Comparison to Malard et al 2019.docx
