# Supplementary material for: Maximum summer temperatures predict the temperature adaptation of Arctic soil bacterial communities
Source: Copernicus journal article supplement (doi:10.5194/bg-20-767-2023), 2023-02-17
Supplement: Supplementary file 1 [file bg-20-767-2023-supplement.zip › bg-20-767-2023-supplement-title-page.pdf]

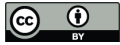

## *Supplement of*

# **Maximum summer temperatures predict the temperature adaptation of Arctic soil bacterial communities**

**Ruud Rijkers et al.**

*Correspondence to:* Ruud Rijkers (r.rijkers@vu.nl)

- bg-20-767-2023-supplement-title-page.pdf
- Figure\_S1\_varImp\_RandomForest.pdf
- Figure\_S2\_comparison\_regression\_trees.pdf
- Figure\_S3\_compare\_RMSE\_mods.pdf
- Figure\_S4\_Pruned\_Tree\_results\_ASV11.pdf
- File S1 - Methods.docx
- Table S1 Soil characteristics.docx
- Table S2 and S3.docx
- Table S4.docx
- Table S5 Comparison to Malard et al 2019.docx

The copyright of individual parts of the supplement might differ from the article licence.
