# Supplementary material for: Maximum summer temperatures predict the temperature adaptation of Arctic soil bacterial communities
Source: Copernicus journal article supplement (doi:10.5194/bg-20-767-2023), 2023-02-17
Supplement: Supplementary file 1 [file bg-20-767-2023-supplement.zip › Figure_S1_varImp_RandomForest.pdf]

Variable Importance per ASV

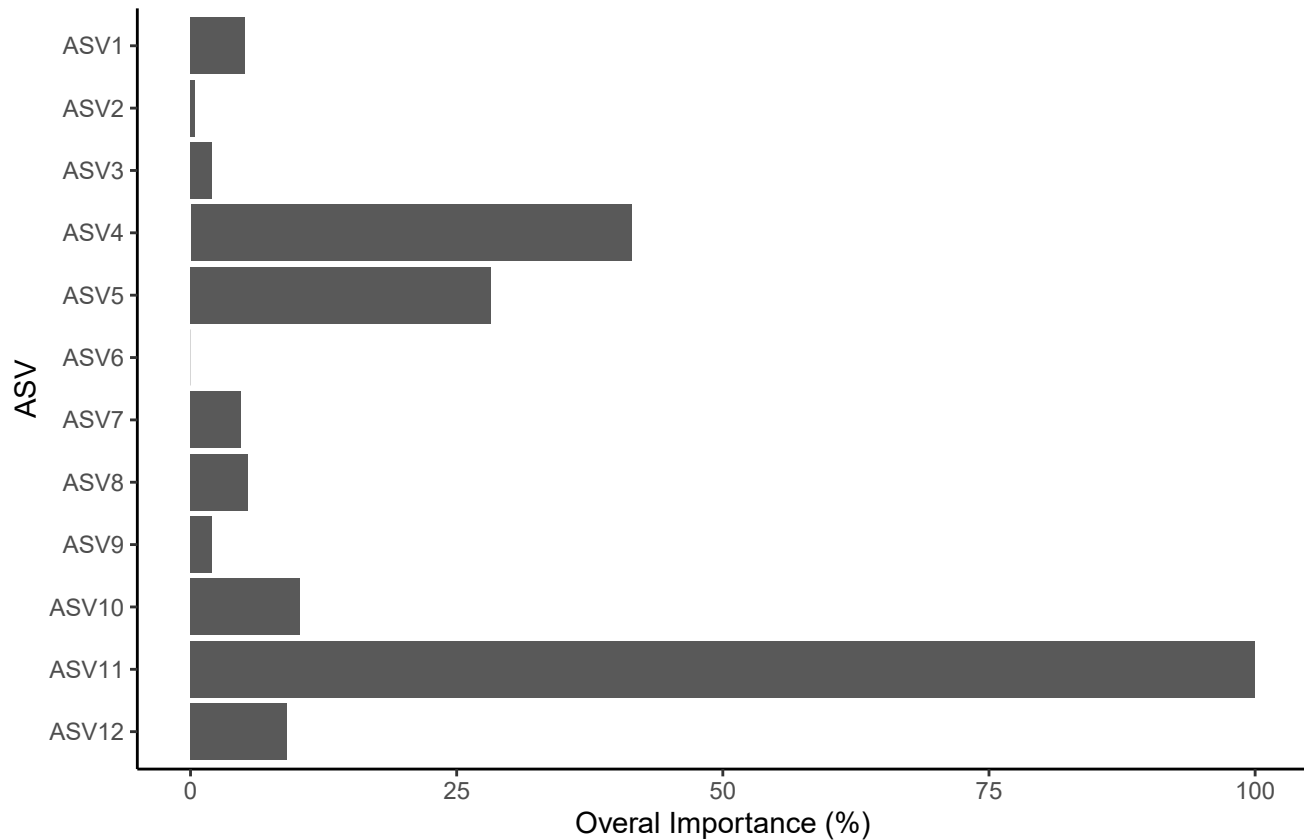

**Supplementary Figure 1.** Importance of variables for Random Forest Tree Regression Analysis
