# Supplementary material for: Maximum summer temperatures predict the temperature adaptation of Arctic soil bacterial communities
Source: Copernicus journal article supplement (doi:10.5194/bg-20-767-2023), 2023-02-17
Supplement: Supplementary file 1 [file bg-20-767-2023-supplement.zip › Figure_S2_comparison_regression_trees.pdf]

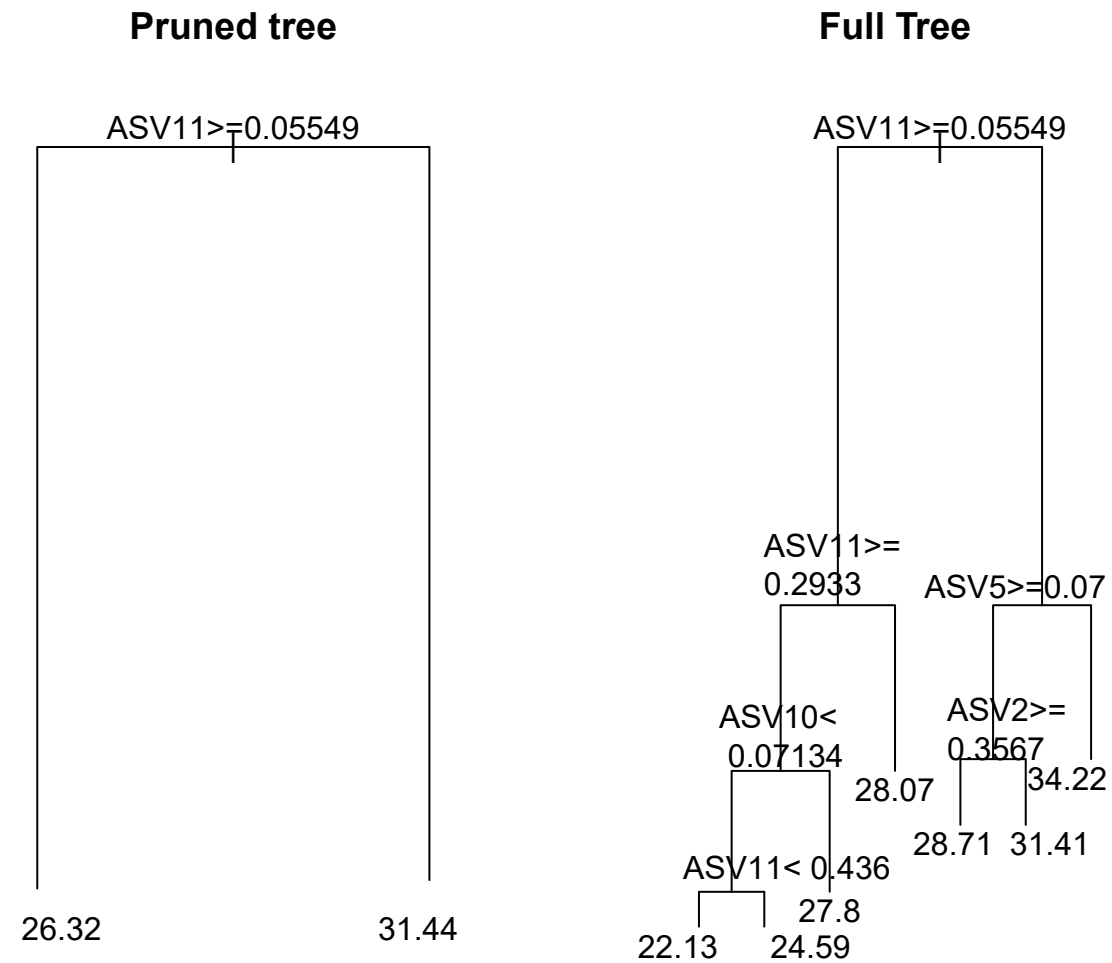

**Supplementary Figure 2.** Regression tree analysis for estimation of  $T_{opt}$  of bacterial community based on the relative abundance of the 12 common ASVs across all soil samples.
