# Supplementary material for: Maximum summer temperatures predict the temperature adaptation of Arctic soil bacterial communities
Source: Copernicus journal article supplement (doi:10.5194/bg-20-767-2023), 2023-02-17
Supplement: Supplementary file 1 [file bg-20-767-2023-supplement.zip › Figure_S4_Pruned_Tree_results_ASV11.pdf]

## Results of Pruned Regression tree

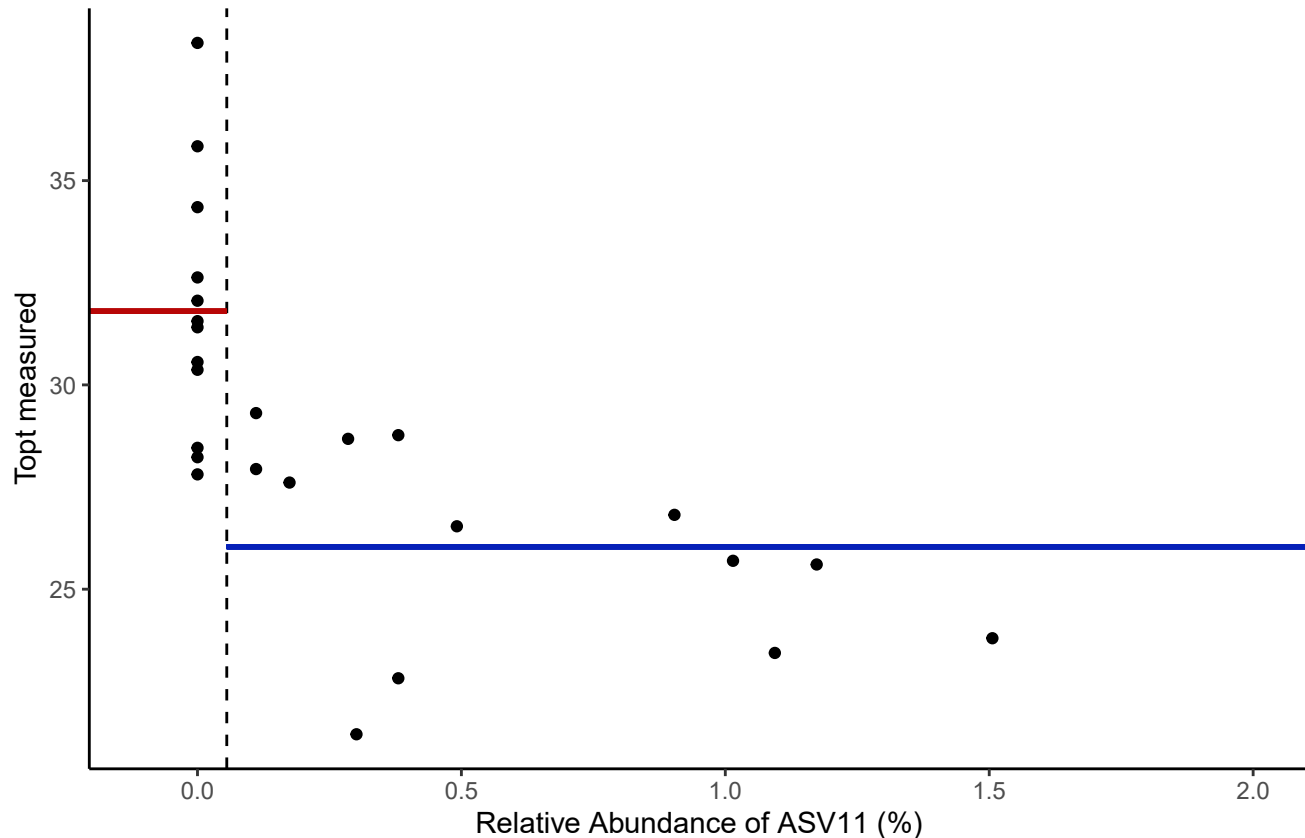

**Supplementary Figure 4.** Scatterplot the relationship between T<sub>opt</sub> of the soil bacterial community and relative abundance of ASV 11 in the community composition. Lines indicate the predicted T<sub>opt</sub> values by the pruned regression tree indicate.
