# Supplementary material for: Maximum summer temperatures predict the temperature adaptation of Arctic soil bacterial communities
Source: Copernicus journal article supplement (doi:10.5194/bg-20-767-2023), 2023-02-17
Supplement: Supplementary file 1 [file bg-20-767-2023-supplement.zip › Table S2 and S3.docx]

| **Supplementary Table 2**. PERMANOVA showing the influence of maximum daily soil temperature and other environmental factors on the weighted UniFrac distance between 16 rRNA gene sequence from soil bacterial communities across the 11 sampled sites bacterial community composition. Bold numbers indicate significance (P<0.05) | | | | | |
| --- | --- | --- | --- | --- | --- |
|  | | | | | |
|  | Df | SumOfSqs | R2 | F | Pr(> F) |
|  | | | | | |
| *STmax* | 1 | 0.01 | 0.04 | 1.9533 | 0.099 |
| pH | 1 | 0.09 | 0.44 | 21.398 | **0.001** |
| Water Content | 1 | 0.01 | 0.03 | 1.5768 | 0.158 |
| Topt | 1 | 0.00 | 0.02 | 1.1037 | 0.311 |
| Organic C | 1 | 0.00 | 0.02 | 1.0997 | 0.275 |
| Organic N | 1 | 0.01 | 0.03 | 1.3844 | 0.19 |
| Residual | 20 | 0.09 | 0.41 |  |  |
| Total | 26 | 0.21 | 1 |  |  |
|  | | | | | |

| **Supplementary Table 3**. PERMANOVA showing the influence of minimum daily soil temperature and other environmental factors on the weighted UniFrac distance between 16 rRNA gene sequence from soil bacterial communities across the 11 sampled sites bacterial community composition. Bold numbers indicate significance (P<0.05) | | | | | |
| --- | --- | --- | --- | --- | --- |
|  | | | | | |
|  | Df | SumOfSqs | R2 | F | Pr(> F) |
|  | | | | | |
| *STmin* | 1 | 0.010 | 0.049 | 2.388 | 0.060 |
| pH | 1 | 0.086 | 0.416 | 20.316 | **0.001** |
| Water Content | 1 | 0.012 | 0.058 | 2.845 | **0.042** |
| Topt | 1 | 0.004 | 0.018 | 0.858 | 0.442 |
| Organic C | 1 | 0.005 | 0.025 | 1.212 | 0.248 |
| Organic N | 1 | 0.005 | 0.024 | 1.180 | 0.269 |
| Residual | 20 | 0.085 | 0.410 |  |  |
| Total | 26 | 0.207 | 1.000 |  |  |
|  | | | | | |
