# Supplementary figures and images for: Maximum summer temperatures predict the temperature adaptation of Arctic soil bacterial communities
Source: Copernicus journal article supplement (doi:10.5194/bg-20-767-2023), 2023-02-17

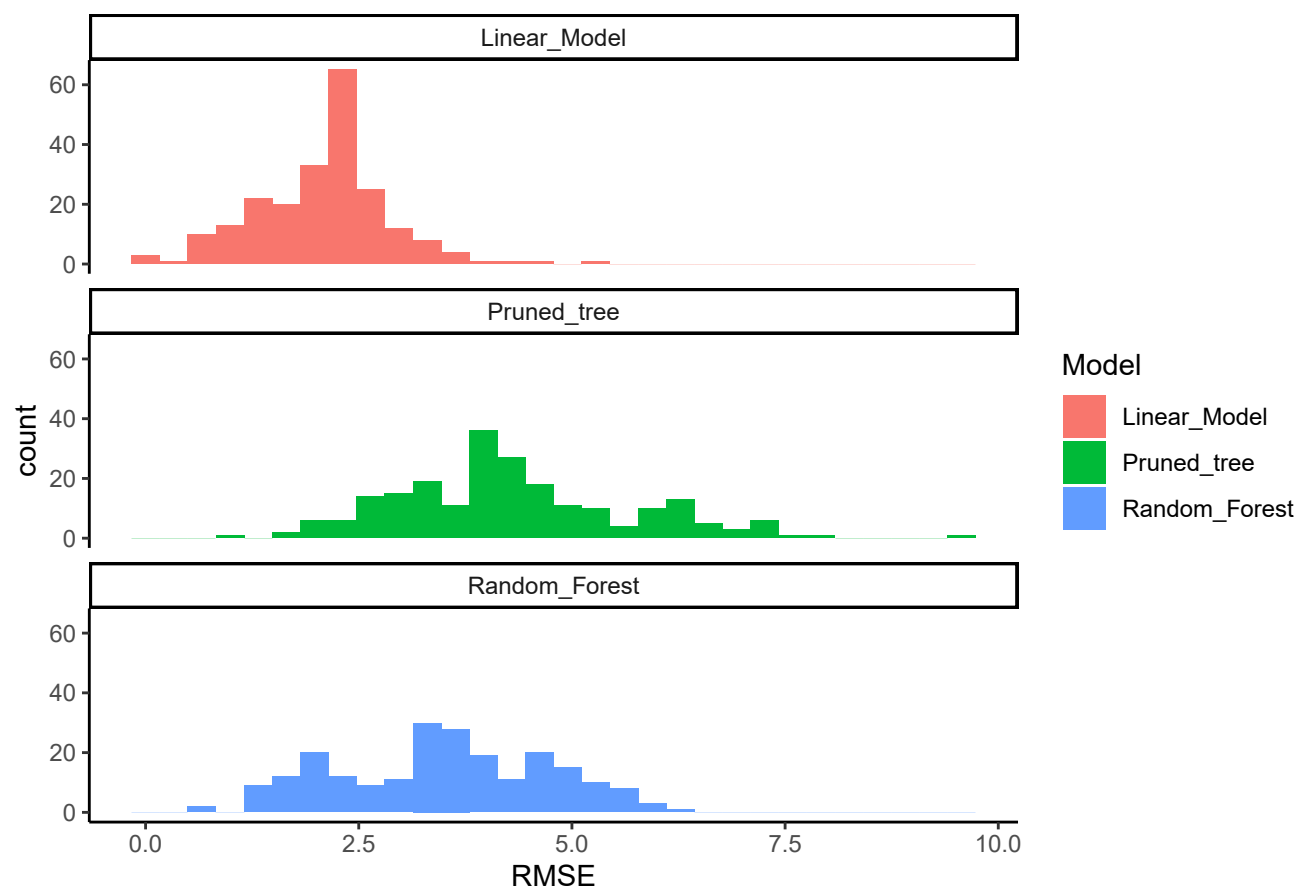

**Supplementary Figure 3.** Histograms of the performance of each model type by RMSE.

Supplement: Supplementary file 1 [file bg-20-767-2023-supplement.zip › Figure_S3_compare_RMSE_mods.pdf]
